# Supplementary material
Source: publisher figshare collection journal article supplement (https://acs.figshare.com/ndownloader/files/8412752)
Supplement: Supplementary file 1 [file 8412752]

## Sheet: TableS1
iteration	pathway	interaction	paralog	complex	total
1	7	0	1	0	8
2	5	0	0	0	5
3	3	0	0	0	3
4	4	0	0	1	5
5	7	2	0	0	9
6	4	0	1	0	5
7	3	0	0	0	3
8	2	1	0	0	3
9	6	1	1	0	8
10	3	1	0	1	5
11	11	0	0	0	11
12	5	0	1	1	7
13	6	4	0	1	11
14	3	1	0	0	4
15	3	1	0	2	6
16	9	1	0	1	11
17	7	0	0	0	7
18	4	2	0	0	6
19	6	0	0	2	8
20	3	0	0	0	3
21	1	0	0	0	1
22	3	0	0	0	3
23	4	2	0	0	6
24	3	1	0	0	4
25	4	0	0	0	4
26	8	2	1	0	11
27	6	0	2	0	8
28	5	0	1	0	6
29	2	0	1	0	3
30	5	3	0	0	8
31	4	0	1	0	5
32	9	2	0	0	11
33	6	0	0	1	7
34	8	1	1	1	11
35	3	0	0	0	3
36	5	0	0	0	5
37	6	1	0	1	8
38	4	1	1	2	8
39	1	0	0	1	2
40	4	1	1	0	6
41	4	1	0	0	5
42	7	1	1	0	9
43	4	0	0	0	4
44	3	0	0	0	3
45	3	0	0	2	5
46	2	0	1	0	3
47	4	2	0	0	6
48	6	0	1	0	7
49	5	0	0	1	6
50	2	1	0	0	3
51	11	1	0	0	12
52	6	3	0	1	10
53	4	0	0	1	5
54	3	1	1	0	5
55	6	1	0	0	7
56	10	1	0	0	11
57	5	1	0	0	6
58	2	2	0	0	4
59	3	2	0	0	5
60	5	1	1	1	8
61	2	1	0	1	4
62	7	1	0	2	10
63	5	0	0	0	5
64	4	0	0	1	5
65	4	0	0	0	4
66	5	2	0	0	7
67	3	2	1	1	7
68	2	1	0	0	3
69	6	0	0	1	7
70	7	2	1	0	10
71	5	1	0	1	7
72	5	0	0	0	5
73	4	1	0	0	5
74	4	1	0	0	5
75	5	0	0	0	5
76	2	0	0	0	2
77	8	2	1	3	14
78	8	0	2	0	10
79	4	1	0	0	5
80	2	2	0	1	5
81	7	0	0	0	7
82	5	2	0	3	10
83	2	2	0	0	4
84	5	0	0	0	5
85	5	0	0	1	6
86	5	1	1	1	8
87	2	1	0	0	3
88	3	0	0	0	3
89	2	1	1	0	4
90	5	1	0	0	6
91	7	3	0	2	12
92	7	0	0	2	9
93	2	0	0	0	2
94	4	0	0	0	4
95	4	2	0	1	7
96	5	1	0	0	6
97	7	1	0	1	9
98	4	0	0	0	4
99	4	1	0	1	6
100	5	0	0	0	5
101	7	4	0	1	12
102	4	1	0	0	5
103	5	3	2	1	11
104	7	0	0	0	7
105	7	0	1	0	8
106	8	1	0	0	9
107	3	4	0	1	8
108	3	0	1	0	4
109	4	3	1	1	9
110	2	1	0	0	3
111	5	2	0	0	7
112	3	2	0	1	6
113	4	4	0	1	9
114	3	0	0	0	3
115	4	2	1	1	8
116	3	1	2	0	6
117	7	2	0	1	10
118	0	1	0	0	1
119	4	1	0	0	5
120	7	0	1	0	8
121	5	2	0	0	7
122	2	1	0	1	4
123	6	0	0	0	6
124	3	0	0	1	4
125	3	0	0	0	3
126	4	2	0	0	6
127	11	1	0	0	12
128	2	2	0	0	4
129	3	0	0	0	3
130	3	2	1	0	6
131	7	2	0	0	9
132	2	2	1	0	5
133	3	1	0	0	4
134	5	4	0	0	9
135	8	1	0	0	9
136	3	2	1	0	6
137	4	0	1	2	7
138	4	0	0	1	5
139	4	0	0	0	4
140	8	0	1	0	9
141	7	2	0	0	9
142	1	0	0	1	2
143	1	0	0	0	1
144	2	1	1	1	5
145	4	0	0	1	5
146	5	1	0	0	6
147	11	2	0	0	13
148	3	1	0	2	6
149	8	1	1	0	10
150	10	1	0	0	11
151	6	1	0	1	8
152	6	2	0	0	8
153	5	1	0	1	7
154	4	0	1	0	5
155	3	4	0	1	8
156	5	3	1	0	9
157	6	1	0	0	7
158	4	0	0	0	4
159	7	2	0	1	10
160	1	3	0	1	5
161	7	4	0	0	11
162	2	3	1	2	8
163	5	2	0	0	7
164	4	2	0	1	7
165	5	2	0	0	7
166	3	0	0	0	3
167	8	0	0	0	8
168	6	1	0	0	7
169	6	0	0	0	6
170	2	3	1	0	6
171	4	2	2	1	9
172	9	1	0	0	10
173	7	1	0	0	8
174	2	0	1	0	3
175	3	2	0	1	6
176	5	0	0	1	6
177	6	1	1	0	8
178	9	1	1	1	12
179	4	0	0	0	4
180	5	3	0	0	8
181	7	2	0	0	9
182	5	1	0	0	6
183	4	0	0	0	4
184	2	1	1	1	5
185	3	1	1	0	5
186	2	0	1	0	3
187	2	1	1	0	4
188	2	0	0	0	2
189	9	1	0	0	10
190	8	2	1	1	12
191	5	1	0	0	6
192	4	1	0	0	5
193	5	1	1	1	8
194	7	1	0	0	8
195	2	0	1	1	4
196	5	1	1	0	7
197	4	3	0	2	9
198	5	0	0	0	5
199	4	1	0	0	5
200	5	0	0	0	5
201	7	0	0	0	7
202	3	1	0	0	4
203	6	0	2	0	8
204	5	0	0	0	5
205	3	0	0	0	3
206	8	0	0	0	8
207	6	0	0	1	7
208	6	0	0	1	7
209	2	1	0	0	3
210	5	0	0	0	5
211	5	1	0	0	6
212	4	0	0	1	5
213	8	0	0	0	8
214	3	0	0	0	3
215	5	3	1	0	9
216	0	0	0	0	0
217	2	1	1	1	5
218	4	2	0	0	6
219	4	0	0	1	5
220	7	3	0	0	10
221	5	1	1	0	7
222	3	0	0	0	3
223	4	2	1	0	7
224	5	0	0	0	5
225	5	1	0	1	7
226	9	3	0	3	15
227	4	0	2	0	6
228	6	3	0	2	11
229	3	0	0	0	3
230	3	1	0	1	5
231	9	1	1	1	12
232	6	0	1	0	7
233	1	0	0	0	1
234	2	0	1	0	3
235	9	3	0	0	12
236	3	1	1	0	5
237	8	3	0	2	13
238	4	0	0	0	4
239	7	0	0	4	11
240	5	0	0	0	5
241	5	2	0	3	10
242	3	2	0	0	5
243	4	1	0	1	6
244	5	1	0	0	6
245	0	4	0	0	4
246	3	1	0	0	4
247	6	0	0	1	7
248	5	2	0	0	7
249	5	0	0	0	5
250	4	2	0	0	6
251	6	1	0	1	8
252	1	0	1	0	2
253	6	0	2	0	8
254	9	1	1	1	12
255	8	0	2	0	10
256	7	0	0	0	7
257	4	2	0	1	7
258	9	3	0	1	13
259	5	1	0	1	7
260	5	1	0	0	6
261	3	1	0	0	4
262	5	2	0	0	7
263	1	1	0	0	2
264	3	1	0	0	4
265	6	2	1	0	9
266	6	2	0	2	10
267	7	1	0	0	8
268	4	0	0	0	4
269	8	1	0	1	10
270	4	0	0	1	5
271	3	2	0	0	5
272	7	1	0	2	10
273	2	2	1	0	5
274	8	1	0	1	10
275	4	2	0	0	6
276	1	0	1	0	2
277	3	1	1	1	6
278	4	1	0	1	6
279	4	0	0	0	4
280	6	0	0	0	6
281	6	2	0	1	9
282	8	0	0	0	8
283	6	1	0	1	8
284	4	1	1	0	6
285	9	1	0	0	10
286	7	3	0	2	12
287	2	2	0	1	5
288	8	0	1	0	9
289	4	4	0	1	9
290	6	2	0	1	9
291	12	0	0	2	14
292	7	2	0	0	9
293	6	0	2	1	9
294	4	0	0	0	4
295	7	0	0	1	8
296	4	1	1	1	7
297	0	0	0	2	2
298	4	0	1	0	5
299	2	0	0	2	4
300	7	3	1	1	12
301	1	0	0	0	1
302	4	0	0	0	4
303	6	0	0	0	6
304	4	1	0	0	5
305	6	3	0	0	9
306	7	0	0	0	7
307	5	0	0	0	5
308	4	0	1	0	5
309	1	1	1	1	4
310	5	2	0	2	9
311	2	0	0	0	2
312	4	1	0	2	7
313	4	1	0	0	5
314	3	0	0	0	3
315	1	1	0	2	4
316	8	1	0	0	9
317	6	1	0	0	7
318	2	3	1	2	8
319	11	3	0	1	15
320	3	0	0	0	3
321	5	1	1	0	7
322	2	0	0	0	2
323	2	0	0	0	2
324	6	0	0	0	6
325	4	0	0	0	4
326	2	2	0	1	5
327	6	1	0	0	7
328	9	0	0	0	9
329	6	1	0	0	7
330	6	0	0	0	6
331	6	0	0	1	7
332	4	0	0	1	5
333	3	0	0	0	3
334	6	2	0	0	8
335	4	2	0	0	6
336	7	0	0	0	7
337	4	2	0	0	6
338	4	0	0	0	4
339	10	1	0	1	12
340	4	2	0	0	6
341	3	1	1	0	5
342	5	1	0	0	6
343	8	0	0	0	8
344	2	2	0	0	4
345	3	1	0	0	4
346	4	0	0	0	4
347	5	1	0	0	6
348	6	1	0	1	8
349	5	3	1	0	9
350	1	3	0	1	5
351	2	2	0	1	5
352	4	1	0	0	5
353	5	0	0	0	5
354	4	0	0	0	4
355	9	3	0	1	13
356	2	1	0	0	3
357	2	0	1	0	3
358	4	2	0	1	7
359	7	1	0	0	8
360	2	1	0	0	3
361	4	0	0	0	4
362	5	2	0	0	7
363	9	1	0	2	12
364	4	0	0	2	6
365	1	0	0	0	1
366	0	1	0	0	1
367	2	0	0	0	2
368	2	0	0	0	2
369	2	1	1	1	5
370	5	1	0	1	7
371	5	0	0	0	5
372	4	1	1	0	6
373	9	1	0	0	10
374	2	0	0	0	2
375	3	0	0	0	3
376	4	1	1	1	7
377	6	0	0	0	6
378	7	1	0	0	8
379	3	1	0	0	4
380	5	2	1	0	8
381	5	1	0	0	6
382	3	1	0	0	4
383	4	2	0	1	7
384	7	1	0	0	8
385	2	0	1	0	3
386	6	0	0	0	6
387	4	0	0	0	4
388	1	1	1	0	3
389	5	1	0	0	6
390	4	2	0	0	6
391	7	2	0	0	9
392	3	0	0	0	3
393	4	1	0	0	5
394	6	1	0	2	9
395	8	1	3	1	13
396	7	0	1	0	8
397	6	2	0	1	9
398	3	2	0	1	6
399	5	1	0	1	7
400	6	0	0	0	6
401	6	0	1	0	7
402	3	0	0	0	3
403	5	0	0	0	5
404	7	3	0	1	11
405	6	0	2	0	8
406	3	0	0	0	3
407	4	0	0	0	4
408	1	0	0	0	1
409	8	0	1	0	9
410	3	2	0	0	5
411	4	1	0	1	6
412	3	2	0	0	5
413	5	1	0	2	8
414	8	2	0	2	12
415	6	2	0	1	9
416	3	0	0	0	3
417	4	0	0	1	5
418	2	1	0	1	4
419	7	2	0	0	9
420	5	0	0	0	5
421	6	3	0	2	11
422	4	0	0	0	4
423	2	1	0	0	3
424	3	0	1	0	4
425	7	1	0	1	9
426	3	1	0	0	4
427	1	1	1	0	3
428	1	0	0	0	1
429	0	1	0	0	1
430	1	1	0	0	2
431	7	0	1	0	8
432	6	0	0	0	6
433	5	1	1	1	8
434	5	3	1	0	9
435	5	1	0	0	6
436	4	0	0	0	4
437	2	1	1	0	4
438	7	2	0	0	9
439	7	2	1	0	10
440	4	1	1	0	6
441	3	1	0	2	6
442	7	1	0	1	9
443	7	0	0	0	7
444	4	0	0	0	4
445	8	0	0	0	8
446	5	1	0	0	6
447	2	2	1	0	5
448	7	2	0	2	11
449	9	2	0	0	11
450	6	1	0	1	8
451	2	1	1	1	5
452	2	1	1	0	4
453	2	1	0	0	3
454	3	3	0	0	6
455	7	2	0	1	10
456	8	1	0	1	10
457	8	1	1	0	10
458	4	0	0	0	4
459	4	1	0	1	6
460	5	1	0	0	6
461	4	0	0	0	4
462	3	2	0	1	6
463	7	2	0	0	9
464	10	1	0	0	11
465	6	0	0	1	7
466	4	0	0	0	4
467	6	0	0	1	7
468	9	1	2	0	12
469	6	2	1	0	9
470	2	1	0	0	3
471	1	0	0	0	1
472	7	2	0	0	9
473	4	1	0	1	6
474	3	0	0	0	3
475	3	2	0	0	5
476	7	0	0	0	7
477	5	2	1	1	9
478	7	1	0	1	9
479	3	2	0	1	6
480	4	1	0	0	5
481	6	1	0	0	7
482	2	0	0	0	2
483	7	0	0	1	8
484	11	1	0	4	16
485	2	0	0	1	3
486	5	3	0	0	8
487	4	0	0	0	4
488	4	1	1	1	7
489	8	1	1	1	11
490	8	2	1	0	11
491	3	0	2	0	5
492	3	1	0	1	5
493	3	1	0	0	4
494	5	1	0	0	6
495	6	1	0	0	7
496	4	3	0	0	7
497	5	1	1	0	7
498	2	1	0	0	3
499	6	0	1	0	7
500	8	3	0	1	12
501	6	1	0	0	7
502	6	2	0	1	9
503	5	1	0	1	7
504	4	0	0	1	5
505	8	4	0	1	13
506	6	1	1	0	8
507	4	1	1	1	7
508	8	0	0	1	9
509	3	2	3	0	8
510	3	1	0	0	4
511	5	1	0	1	7
512	2	0	1	0	3
513	8	2	2	0	12
514	3	3	1	0	7
515	6	1	0	0	7
516	5	1	0	0	6
517	6	2	1	0	9
518	6	1	0	1	8
519	7	0	1	0	8
520	8	2	0	1	11
521	7	1	1	1	10
522	4	2	0	1	7
523	7	0	0	1	8
524	4	0	0	0	4
525	5	1	0	0	6
526	7	1	1	0	9
527	8	0	0	0	8
528	3	2	0	0	5
529	3	1	0	0	4
530	8	0	0	0	8
531	4	1	0	1	6
532	6	0	0	1	7
533	9	0	0	0	9
534	7	1	1	0	9
535	3	0	0	0	3
536	1	1	0	1	3
537	9	1	0	0	10
538	4	2	1	0	7
539	7	0	0	0	7
540	3	1	1	0	5
541	8	1	0	0	9
542	10	1	0	0	11
543	3	3	0	1	7
544	11	2	0	0	13
545	6	0	0	0	6
546	2	1	0	0	3
547	5	0	0	1	6
548	2	0	0	0	2
549	3	0	0	2	5
550	1	0	0	1	2
551	4	2	0	1	7
552	4	0	1	0	5
553	6	1	0	1	8
554	7	0	0	0	7
555	5	0	0	1	6
556	7	0	1	1	9
557	4	0	0	1	5
558	3	1	0	0	4
559	1	2	1	0	4
560	3	1	0	0	4
561	1	0	0	0	1
562	5	3	0	3	11
563	2	1	1	0	4
564	4	0	0	0	4
565	3	0	0	0	3
566	5	0	0	0	5
567	4	1	0	0	5
568	3	2	0	2	7
569	8	1	0	1	10
570	3	1	1	0	5
571	7	1	0	0	8
572	4	1	0	1	6
573	9	2	0	1	12
574	5	0	0	0	5
575	6	1	0	2	9
576	4	0	0	1	5
577	3	1	0	0	4
578	5	2	0	2	9
579	4	1	0	0	5
580	5	1	1	0	7
581	6	2	0	0	8
582	4	1	0	2	7
583	5	2	1	0	8
584	4	0	0	0	4
585	7	1	0	1	9
586	4	0	0	0	4
587	5	1	0	0	6
588	3	1	1	1	6
589	5	3	0	0	8
590	5	1	0	0	6
591	10	1	0	1	12
592	7	0	0	0	7
593	5	1	0	1	7
594	9	0	0	0	9
595	5	0	0	0	5
596	7	0	0	0	7
597	3	0	0	0	3
598	3	0	1	0	4
599	2	0	0	0	2
600	3	0	0	0	3
601	3	0	1	1	5
602	2	2	1	0	5
603	5	2	0	0	7
604	3	1	0	0	4
605	4	3	0	1	8
606	1	2	1	0	4
607	7	1	0	1	9
608	5	0	0	1	6
609	2	3	0	2	7
610	5	0	0	1	6
611	8	2	1	0	11
612	6	2	0	2	10
613	5	0	0	0	5
614	4	2	0	1	7
615	8	0	0	0	8
616	4	1	0	0	5
617	6	2	0	1	9
618	5	2	0	1	8
619	5	0	1	1	7
620	7	0	1	0	8
621	5	0	0	0	5
622	2	1	0	0	3
623	2	3	2	1	8
624	6	1	0	1	8
625	6	1	0	0	7
626	4	2	0	0	6
627	4	2	0	0	6
628	3	1	0	0	4
629	4	1	1	0	6
630	5	1	0	1	7
631	3	0	0	1	4
632	2	1	0	0	3
633	10	0	0	1	11
634	4	0	0	1	5
635	4	2	1	0	7
636	3	0	1	1	5
637	4	0	0	0	4
638	7	1	0	2	10
639	5	0	1	1	7
640	8	3	0	0	11
641	6	1	0	0	7
642	4	4	0	1	9
643	2	1	0	0	3
644	3	3	0	0	6
645	10	1	1	2	14
646	7	0	0	1	8
647	3	2	0	0	5
648	2	0	0	0	2
649	4	2	0	1	7
650	7	0	0	0	7
651	10	2	0	2	14
652	7	1	0	0	8
653	4	2	0	0	6
654	5	1	0	1	7
655	7	2	0	0	9
656	3	1	0	0	4
657	5	2	0	0	7
658	3	0	0	0	3
659	3	1	0	1	5
660	3	1	2	0	6
661	4	1	0	0	5
662	4	1	0	1	6
663	4	1	0	1	6
664	5	0	0	0	5
665	4	0	0	1	5
666	1	0	0	0	1
667	10	3	0	1	14
668	10	4	0	2	16
669	5	2	0	0	7
670	7	1	1	0	9
671	6	1	0	0	7
672	3	0	0	0	3
673	6	1	0	0	7
674	6	0	0	1	7
675	11	3	0	1	15
676	3	1	1	0	5
677	5	0	0	0	5
678	4	1	0	0	5
679	7	3	1	0	11
680	4	0	0	1	5
681	5	1	1	2	9
682	4	1	0	0	5
683	8	0	1	0	9
684	1	2	0	0	3
685	5	2	0	2	9
686	2	0	1	0	3
687	5	2	0	2	9
688	4	2	0	0	6
689	3	3	1	0	7
690	4	3	0	1	8
691	2	0	0	0	2
692	7	1	0	0	8
693	2	1	0	0	3
694	1	0	0	0	1
695	4	3	0	0	7
696	6	2	1	2	11
697	5	0	0	1	6
698	1	0	0	0	1
699	5	0	0	0	5
700	5	4	0	0	9
701	3	0	1	0	4
702	6	0	0	1	7
703	6	1	0	0	7
704	7	0	0	1	8
705	10	1	1	1	13
706	3	1	0	0	4
707	2	1	1	0	4
708	6	0	0	0	6
709	3	2	0	0	5
710	7	0	1	0	8
711	3	1	0	0	4
712	6	0	0	0	6
713	7	0	1	0	8
714	5	0	1	0	6
715	4	2	0	0	6
716	3	0	0	0	3
717	2	2	0	0	4
718	10	0	0	0	10
719	2	4	0	0	6
720	2	3	0	1	6
721	6	0	1	0	7
722	6	3	2	1	12
723	7	2	1	1	11
724	5	3	0	1	9
725	3	3	0	2	8
726	3	0	0	0	3
727	5	0	0	0	5
728	4	0	0	0	4
729	4	1	0	1	6
730	4	0	0	0	4
731	6	0	0	0	6
732	11	1	1	1	14
733	4	3	1	0	8
734	10	1	0	3	14
735	6	2	0	0	8
736	5	0	0	1	6
737	3	0	1	1	5
738	4	2	1	0	7
739	7	2	0	0	9
740	9	0	1	2	12
741	7	2	0	1	10
742	5	0	0	0	5
743	5	0	1	0	6
744	5	1	0	0	6
745	8	0	0	0	8
746	10	0	0	1	11
747	9	0	0	0	9
748	6	2	0	0	8
749	8	0	0	2	10
750	6	0	0	0	6
751	9	2	0	0	11
752	9	0	0	0	9
753	5	0	0	0	5
754	3	1	1	0	5
755	2	1	0	0	3
756	4	4	0	0	8
757	1	1	0	0	2
758	6	3	0	0	9
759	11	2	0	0	13
760	3	2	0	0	5
761	3	0	0	0	3
762	1	0	0	0	1
763	2	1	0	0	3
764	2	0	0	0	2
765	4	1	0	0	5
766	9	0	0	0	9
767	4	0	0	0	4
768	4	2	0	0	6
769	1	1	1	0	3
770	6	1	0	0	7
771	4	1	0	0	5
772	2	0	0	0	2
773	9	1	0	0	10
774	1	2	0	0	3
775	6	0	0	1	7
776	4	1	0	0	5
777	8	1	0	1	10
778	4	1	0	1	6
779	5	1	0	0	6
780	3	0	0	0	3
781	5	1	0	0	6
782	7	1	1	0	9
783	3	0	0	0	3
784	4	1	0	0	5
785	3	3	0	1	7
786	5	1	0	3	9
787	4	0	1	0	5
788	3	2	0	0	5
789	7	3	0	1	11
790	8	2	1	0	11
791	4	3	0	2	9
792	4	0	0	0	4
793	3	1	0	0	4
794	5	1	0	0	6
795	8	0	0	0	8
796	4	1	0	1	6
797	8	0	0	2	10
798	4	1	0	0	5
799	10	2	0	0	12
800	3	0	0	0	3
801	2	1	0	1	4
802	3	0	0	2	5
803	6	1	0	0	7
804	4	1	0	1	6
805	5	2	0	0	7
806	5	2	0	0	7
807	8	1	0	0	9
808	5	2	0	0	7
809	4	3	0	0	7
810	1	2	0	0	3
811	3	2	0	0	5
812	6	0	0	0	6
813	7	1	0	0	8
814	5	0	0	0	5
815	3	0	1	0	4
816	3	1	1	1	6
817	8	3	0	2	13
818	3	0	0	0	3
819	7	1	0	0	8
820	4	0	0	1	5
821	5	1	0	1	7
822	5	2	0	2	9
823	2	1	0	0	3
824	4	0	0	0	4
825	3	3	0	1	7
826	2	1	2	1	6
827	8	1	0	0	9
828	1	0	0	0	1
829	8	4	0	4	16
830	7	0	0	0	7
831	2	1	0	0	3
832	4	2	1	0	7
833	6	1	0	2	9
834	8	1	0	1	10
835	1	1	0	0	2
836	2	0	2	0	4
837	2	0	0	0	2
838	6	2	0	0	8
839	5	0	0	1	6
840	2	0	0	0	2
841	2	1	0	0	3
842	3	1	0	1	5
843	10	1	1	1	13
844	4	1	0	1	6
845	3	1	1	0	5
846	0	2	0	1	3
847	11	1	0	1	13
848	4	0	0	0	4
849	3	0	0	0	3
850	6	1	1	0	8
851	4	0	1	0	5
852	5	0	0	1	6
853	8	1	0	0	9
854	5	2	0	0	7
855	3	3	1	0	7
856	3	1	0	1	5
857	2	0	0	0	2
858	3	0	0	0	3
859	5	0	1	1	7
860	3	0	1	0	4
861	10	2	1	0	13
862	5	1	0	0	6
863	5	0	0	1	6
864	5	0	0	0	5
865	5	0	0	1	6
866	4	0	2	1	7
867	7	0	1	0	8
868	9	2	1	1	13
869	5	0	1	1	7
870	3	1	1	0	5
871	6	2	0	0	8
872	3	0	1	1	5
873	6	1	1	0	8
874	8	2	0	1	11
875	5	0	0	2	7
876	4	1	0	0	5
877	4	2	0	1	7
878	1	0	0	1	2
879	4	2	0	1	7
880	5	3	1	0	9
881	6	1	1	1	9
882	3	1	0	1	5
883	6	2	0	0	8
884	1	1	0	1	3
885	4	1	0	0	5
886	5	0	1	0	6
887	6	0	0	1	7
888	9	1	0	1	11
889	7	0	0	0	7
890	1	3	1	1	6
891	0	3	0	0	3
892	5	1	0	0	6
893	4	1	0	2	7
894	5	0	1	2	8
895	0	0	0	0	0
896	4	1	1	1	7
897	3	0	1	0	4
898	5	0	0	0	5
899	6	0	0	0	6
900	5	0	0	0	5
901	4	0	0	1	5
902	2	1	0	1	4
903	2	1	1	0	4
904	3	1	0	0	4
905	6	0	1	0	7
906	2	0	0	0	2
907	5	0	0	0	5
908	5	0	0	0	5
909	4	1	3	0	8
910	2	2	0	0	4
911	2	1	1	0	4
912	3	1	0	0	4
913	3	0	0	0	3
914	13	1	0	3	17
915	1	3	0	0	4
916	3	1	0	1	5
917	3	1	1	0	5
918	7	3	1	0	11
919	3	1	0	1	5
920	7	0	1	0	8
921	4	3	1	0	8
922	2	0	0	1	3
923	7	2	1	1	11
924	4	0	0	2	6
925	4	2	0	0	6
926	2	2	1	0	5
927	5	1	0	1	7
928	6	1	0	0	7
929	2	1	1	1	5
930	4	2	0	0	6
931	8	0	0	0	8
932	4	2	0	0	6
933	2	2	0	0	4
934	4	2	0	1	7
935	6	1	0	0	7
936	2	1	1	0	4
937	6	2	0	1	9
938	6	3	0	1	10
939	4	1	0	1	6
940	8	1	0	1	10
941	6	1	1	0	8
942	6	2	0	2	10
943	6	2	0	0	8
944	4	2	1	1	8
945	7	0	0	0	7
946	7	1	0	0	8
947	5	0	1	1	7
948	3	0	0	0	3
949	3	3	0	0	6
950	4	1	0	1	6
951	4	0	0	0	4
952	6	1	0	0	7
953	6	1	0	1	8
954	8	1	0	0	9
955	5	4	1	1	11
956	4	0	0	1	5
957	6	1	0	0	7
958	5	0	0	1	6
959	7	0	0	0	7
960	4	1	1	1	7
961	5	1	0	0	6
962	3	0	1	1	5
963	7	2	1	1	11
964	1	1	0	0	2
965	3	0	0	0	3
966	1	1	0	1	3
967	7	0	0	1	8
968	5	2	0	1	8
969	4	1	0	0	5
970	7	0	0	1	8
971	2	1	0	0	3
972	6	1	0	1	8
973	2	1	0	0	3
974	5	1	1	2	9
975	6	0	0	0	6
976	5	1	0	1	7
977	3	0	0	0	3
978	2	0	0	0	2
979	7	1	0	1	9
980	1	0	0	0	1
981	3	0	0	0	3
982	3	1	0	1	5
983	4	1	1	2	8
984	4	0	0	0	4
985	4	1	0	1	6
986	4	1	0	1	6
987	10	0	0	0	10
988	4	1	1	1	7
989	3	1	0	1	5
990	3	0	0	0	3
991	5	3	1	0	9
992	4	1	0	0	5
993	4	1	0	0	5
994	7	1	1	0	9
995	3	1	0	1	5
996	3	1	0	0	4
997	2	0	0	0	2
998	4	0	0	2	6
999	5	0	0	1	6
1000	8	0	1	0	9
